# Supplementary material
Source: PubMed Central journal article supplement (PMC3480325)
Supplement: NIHMS354860-supplement-01.pdf [file NIHMS354860-supplement-01.pdf]

## Supplement

### Supplemental Figure Legends

**Fig. S1.** (a) Generation of bigenic offspring from heterozygous Six2-GFPCre<sup>+</sup> mice and homozygous iDTR<sup>+</sup> mice. Inheritance of transgenes occurred at mendelian ratios. Animals testing positive for both transgenes (Six2-GFPCre<sup>+</sup>;iDTR<sup>+</sup>) were considered bigenic and labeled DTR<sup>rec</sup> (here animals 2, 3, 4). Single transgenic littermates (here animals 1, 5) and vehicle (PBS)-treated DTR<sup>rec</sup> mice served as controls. (b) In adult DTR<sup>rec</sup> mice, renal epithelial cells rendered susceptible to DT (blue) are expected to include proximal and distal tubules, but not collecting ducts due to their ureteric bud lineage. (c) Comparison of body weight between bigenic DTR<sup>rec</sup> and littermate control mice. Data are given as mean  $\pm$  SEM. (d) Comparison of glomerular counts between bigenic DTR<sup>rec</sup> and littermate controls, indicating no significant difference in glomerular endowment. Data points represent counts/section of individual animals, horizontal lines represent mean values.

**Fig. S2.** Vessels are not affected by DT in kidneys of DTR<sup>rec</sup> mice. (a&b) H&E stained micrographs of DTR<sup>rec</sup> kidneys three days after administration of a single lethal dose of DT. Note regular morphology of vessels (*asterisk*). By contrast, surrounding tubules exhibit signs of severe injury. Scale bars: 50 $\mu$ m. (c) EM micrograph showing normal vessel ultrastructure in a DTR<sup>rec</sup> kidney three days after DT treatment. Scale bar: 5 $\mu$ m.

**Fig. S3.** Distribution of TUNEL+ apoptotic cells in kidneys of DTR<sup>rec</sup> mice three days after administration of a sublethal (0.15 $\mu$ g/kg) or lethal (0.25 $\mu$ g/kg) dose of DT. (a&b) Costaining with FITC-labeled *Lotus tetragonolobus* (LTA) lectin (1:500, Vector Labs), which has a high affinity

Formatted: Justified

Formatted: Font: Bold

Formatted: Superscript

Formatted: Font: Bold

Formatted: Font: Bold

Formatted: Superscript

Formatted: Font: Italic

Formatted: Font: Bold

Formatted: Superscript

Formatted: Font: Bold

Formatted: Justified

Formatted: Superscript

Formatted: Font: Bold

Formatted: English (U.S.)

for the apical aspect of proximal tubules, shows that the vast majority of apoptotic cells (TUNEL<sup>+</sup> nuclei) in sublethally injured DTR<sup>rec</sup> kidneys are located in LTA<sup>+</sup> proximal tubules and in close association with glomeruli thus consistent with S1/S2 segments. By contrast, no apoptotic bodies were observed in glomerular tufts (G) or in FITC-labeled *Dolichos biflorus* agglutinin (DBA) lectin<sup>+</sup> (1:500, Vector Labs) collecting ducts (basolateral staining). Note loss of LTA affinity in lethally injured kidneys due to increased severity of damage in proximal tubules. Scale bars: 50µm, n=4-5 per group.

Formatted: English (U.S.)

Formatted: Superscript

Formatted: Superscript

Formatted: Superscript

Formatted: Font: (Default) Arial

Formatted: Font: (Default) Arial, Superscript

Formatted: Font: (Default) Arial

Formatted: English (U.S.)

**Fig. S42.** (a) Electronmicrograph shows, at higher power, degenerated epithelial cells at the glomerulotubular junction with nuclear condensation (*asterisk*), segmental loss of brush border and cytoplasmic debris within the urinary space. Note intact podocytes with complete preservation of foot processes in immediate proximity. Scale bar: 2µm. (b) Staining with Kim-1-specific antibody. *Left:* Representative micrographs show substantial induction of Kim-1 in apical aspects of selected tubules in DTR<sup>rec</sup> kidney cortex 3 days after DT administration. Scale bar: 50µm. *Right:* ~~Semi-automated~~ Quantitative time course analysis of Kim-1<sup>+</sup> fluorescence area demonstrates the appearance of Kim-1 as early as ~~24-1 day hours~~ and ~~culminating~~ ~~increasing~~ at 3 days after DT injection. Values are shown as mean ± SEM, n=3-4 for each data point; \*P<0.01. (c) Electropherograms of urine samples from the same DTR<sup>rec</sup> mouse obtained at baseline (~~0d~~) and at various time points after DT administration. Note transient appearance of additional peaks (*arrow head*) in the size range of 60 to 75 kDa ~~and thus~~ consistent with albumin at 3 days after injection. (d) Fragmentation and quantitative analysis of urinary protein fractions reveals a relative increase of proteins >50 kDa, peaking at day 3 after DT injection and returning to baseline levels thereafter. Values are given as mean ± SEM, n=3-6 for each data point; \*P<0.01, \*\*P<0.001 vs. baseline (0d). (e) Reagent strip-based estimate of urinary albumin in DTR<sup>rec</sup> and littermate control mice before and at various time points after DT administration.

Formatted: Superscript

In support of the chip data, the findings indicate a significant but reversible increase in urinary albumin after DT-induced injury showing normalization by day 14 after injection (1=trace, 2=30mg/dL, 3=100mg/dL, 4=300mg/dL, 5=2000mg/dL or more). Data points represent measurements of individual animals, horizontal lines represent mean values; \* $P < 0.0001$ , \*\* $P < 0.00001$ .

**Fig. S5.** Distribution of Ki67<sup>+</sup> proliferating epithelial cells in kidneys of DTR<sup>rec</sup> mice at day 3 after administration of a sublethal (0.15µg/kg) or lethal (0.25µg/kg) dose of DT. (a-c) Double-staining of kidney sections with anti-Ki67 antibody/FITC-labeled LTA and anti-Ki67 antibody/FITC-labeled DBA shows that the majority of Ki67<sup>+</sup> epithelial cells are located in LTA<sup>+</sup> proximal tubules in sublethally injured DTR<sup>rec</sup> kidneys. The prevalence of Ki67<sup>+</sup> cells in glomerular tufts or DBA<sup>+</sup> collecting ducts is low and comparable between sublethally and lethally injured DTR<sup>rec</sup> kidneys. Note again loss of LTA affinity in lethally injured kidneys due to widespread and severe damage of the proximal tubular epithelium. Scale bars: 50µm.

Formatted: Font: Bold

Formatted: Superscript

Formatted: Font: Not Bold

Formatted: Font: Bold

Formatted: Superscript

Formatted: Superscript

Formatted: Superscript

Formatted: Superscript

Formatted: Superscript

**Fig. S64.** (a) Quantitative analysis of proliferative activity by Ki67-specific staining of kidney sections from repeatedly (3x at weekly intervals) DT-treated (0.15µg/kg) DTR<sup>rec</sup> and control mice at 5 weeks after the first treatment. Left: Representative micrographs of renal cross sections stained with anti-Ki67 antibody. Scale bar: 20µm. Right: Quantitation demonstrates strong increases in Ki67<sup>+</sup> cells in the tubular epithelium as well as the interstitium of repeatedly DT-injured kidneys. Values are given as mean ± SEM, n=3 for each data point; \* $P < 0.001$ . (b & c) Additional cell type-specific immunostaining and quantification of chronically injured DTR<sup>rec</sup> and uninjured littermate control kidneys. Left: Representative micrographs of sections stained for αSMA (myofibroblasts) and FSP-1/S100A4. Scale bars: 20µm. Right: Comparative

Formatted: Superscript

quantifications of fluorescence area per high power field and cell counts, respectively, reveal an increase in myofibroblasts and FSP-1<sup>+</sup> cells in the expanded tubulointerstitium of repeatedly DT-injured kidneys from DTR<sup>rec</sup> mice. Values are given as mean  $\pm$  SEM, n=3-5 for each data point; \* $P$ <0.05, \*\* $P$ <0.001.

## Supplemental Figure S1

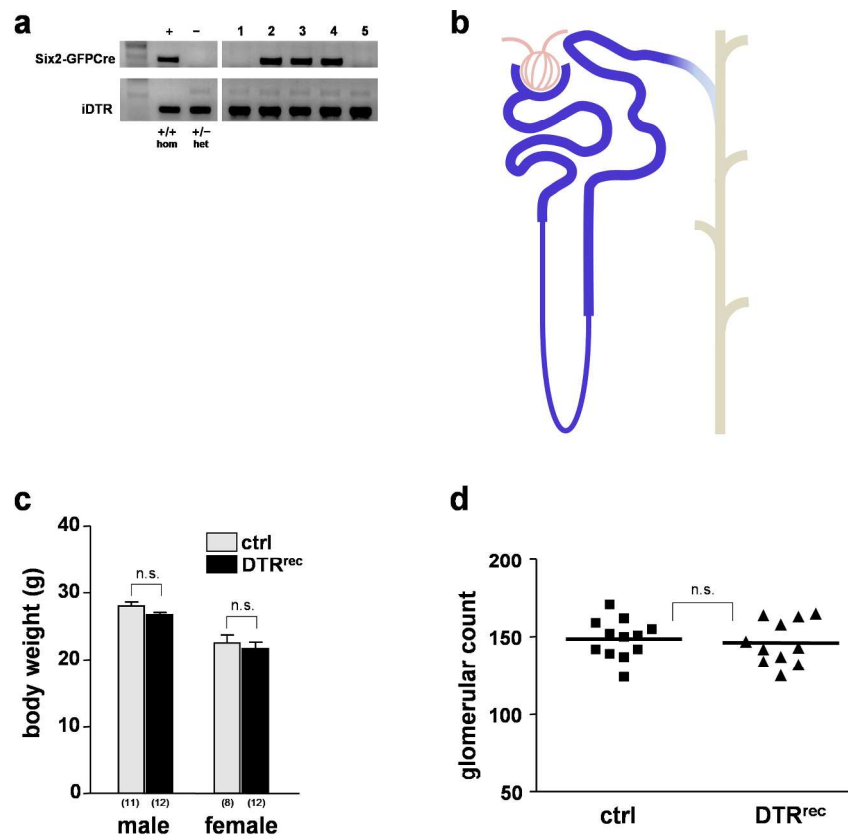

190x254mm (300 x 300 DPI)

### Supplemental Figure S2

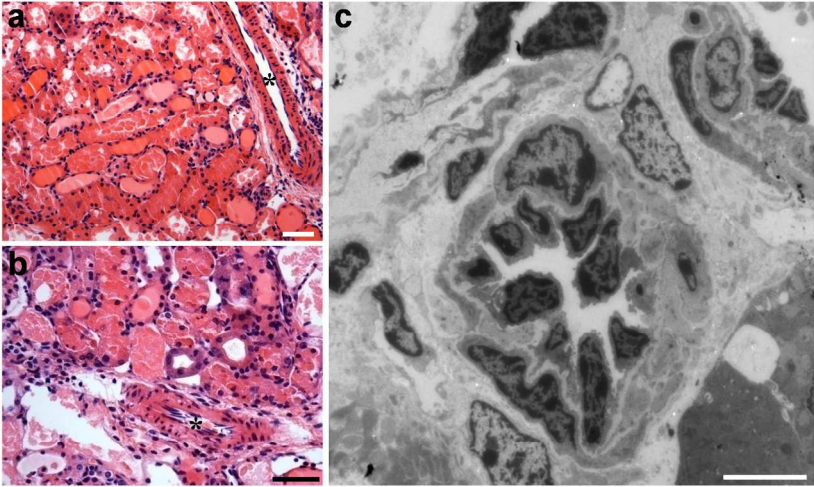

190x254mm (300 x 300 DPI)

## Supplemental Figure S3

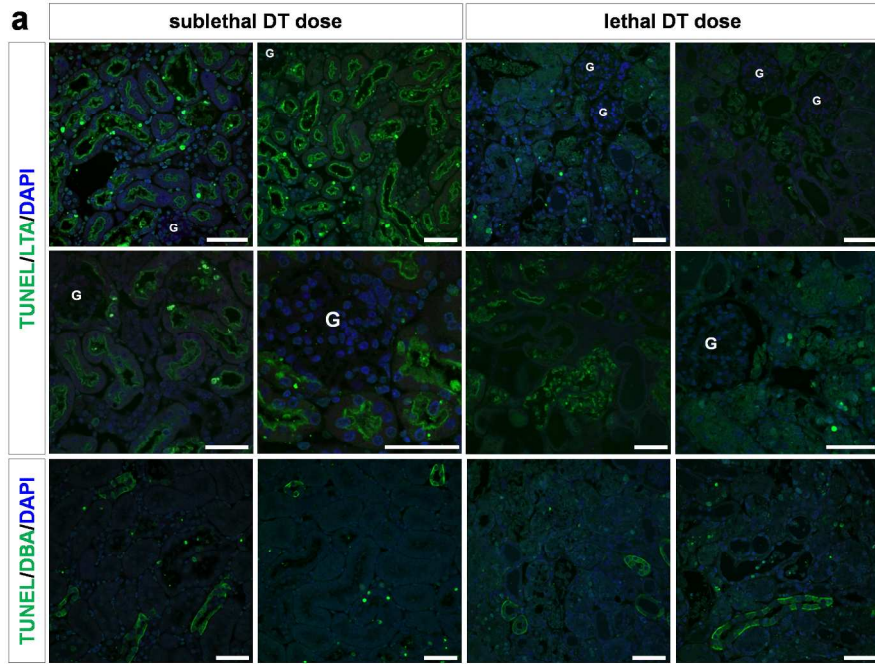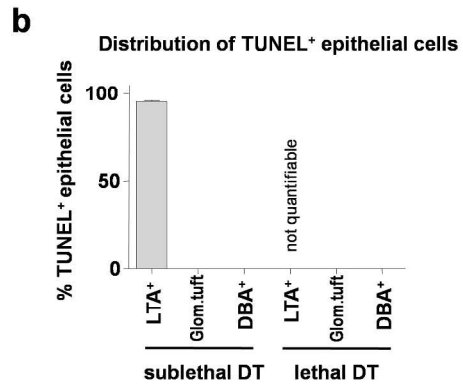

190x254mm (300 x 300 DPI)

### Supplemental Figure S4

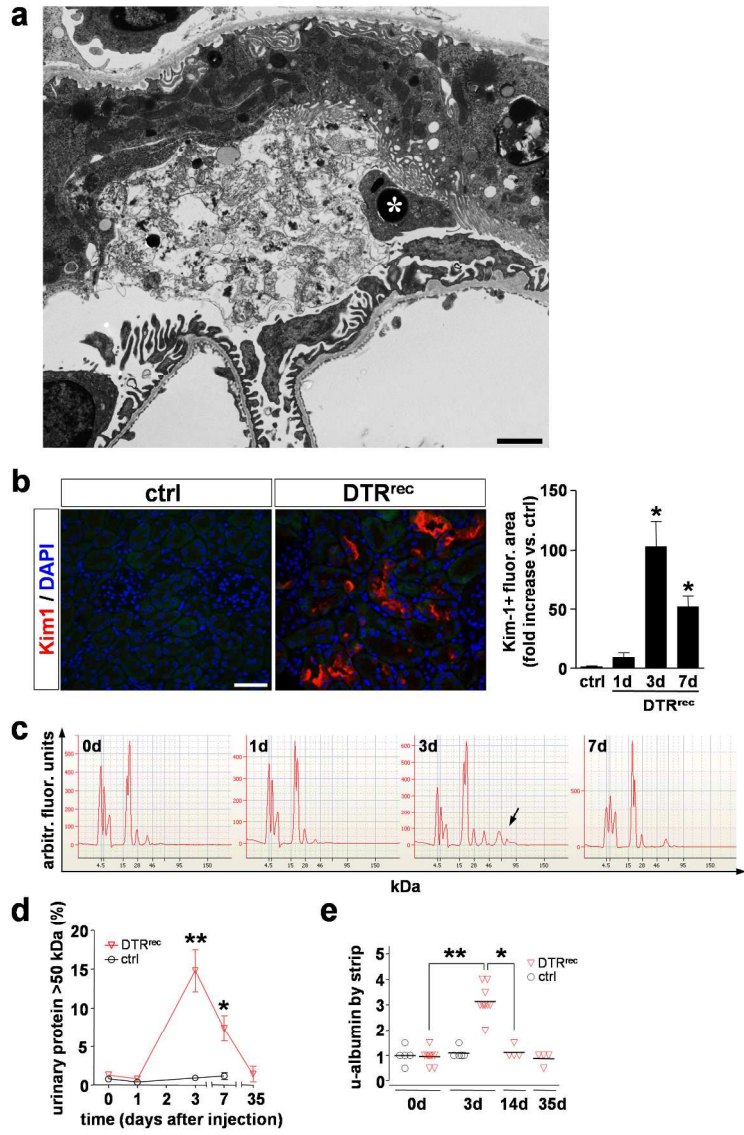

190x254mm (300 x 300 DPI)



## Supplemental Figure S5

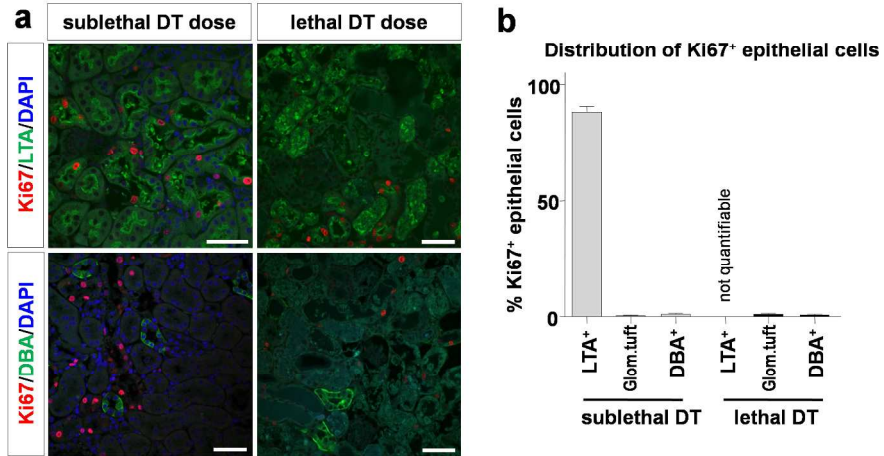

190x254mm (300 x 300 DPI)

### Supplemental Figure S6

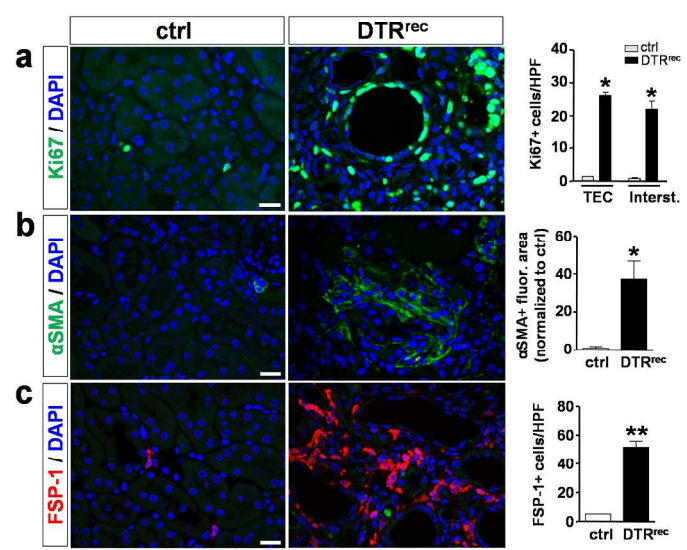

190x254mm (300 x 300 DPI)

## Supplement

### Materials and Methods

#### Microbead-based immunoassay

Urine Kim-1 and NGAL protein concentrations were measured using Luminex xMAP technology. Briefly, 30  $\mu$ l of each protein sample were incubated with ~6000 anti-mouse Kim-1 and anti-mouse NGAL coupled beads/well, respectively, for 1 hr followed by 3 washes with PBST. Samples were then incubated with biotinylated Kim-1 and NGAL detection antibodies for 45 min and washed again 3 times with PBST. Quantification was achieved by incubating samples with picroerythrin-coupled streptavidin (Invitrogen) and excited at 532 nm. The signal from this flouochrome was detected using the Bio-Plex system (BioRad) and is directly proportional to the amount of antigen bound to the microbead surface. Data was interpreted using a 13-point standard five parametric logistic regression model. All samples were analyzed in triplicate and the intra-assay variability was less than 15 %.

#### Immunofluorescence staining

Immunohistological staining of kidney sections was performed as previously described (Yang et al, Nat. Med., 2010). Briefly, rehydrated paraffin-embedded (3 $\mu$ m) or cryopreserved (7 $\mu$ m) sections were labeled with primary antibodies, including goat anti-Kim-1 (R&D, 1:500), [rabbit anti-Tamm-Horsfall/uromodulin \(Biomedical Technologies Inc., 1:100\)](#), rabbit anti-Ki67 (Vector Labs, 1:200), rat anti-PDGFR $\beta$  (ebioscience, 1:200), FITC-conjugated anti- $\alpha$ SMA (Sigma, 1:500), rat anti-CD31 (ebioscience, 1:100), rat anti-F4/80 (Abcam, 1:100), rat anti-BrdU (Abcam, 1:200), rabbit anti-CD3 (Vector Labs, 1:200), rat anti-neutrophil (Santa Cruz, 1:100) and rabbit anti-FSP-1/S100A4 (Abcam, 1:100). Slides were subsequently exposed to corresponding FITC-

or Cy3-conjugated secondary antibodies (Jackson ImmunoResearch) and mounted with DAPI-containing Vectashield mounting medium (Vector Labs). [FITC-conjugated Lotus tetragonolobus \(LTA\) lectin \(Vector Labs, 1:500\)](#) and [FITC-conjugated Dolichos biflorus agglutinin \(DBA\) lectin \(Vector Labs, 1:500\)](#) were used to identify proximal tubules and collecting ducts, respectively.

Staining was examined by fluorescence microscopy (Nikon C1 confocal and Nikon eclipse 90i) and semi-automated quantitation was performed using ImageJ software (<http://rsbweb.nih.gov/ij/>).

Formatted: English (U.S.)
